# Supplementary material
Source: Springer Nature journal article supplement (https://www.springermedizin.de/resource/supplementary/12889_2013_6301_MOESM3_ESM.pdf/9497138)

Children:

1

20

As

Pb

Cd

Mn

Cr

Hg

z-score: -1

+1

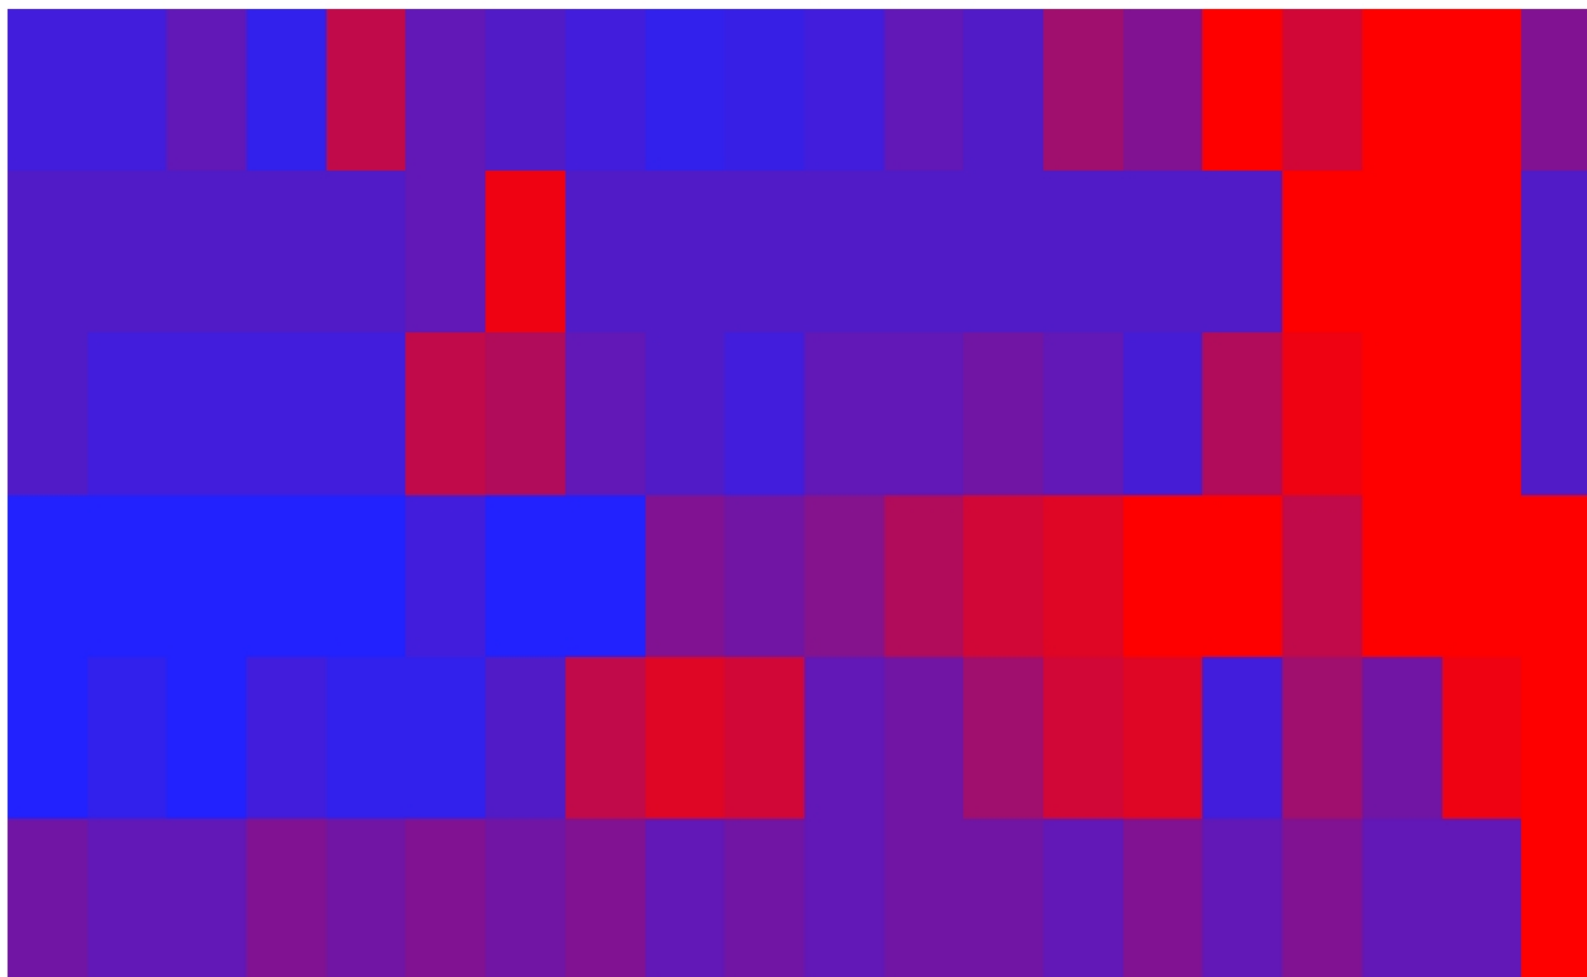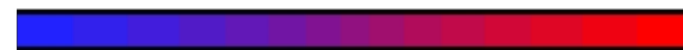

Supplement: MOESM3 [file 9497138]
